# Supplementary material for: Implications of alpha-synuclein nitration at tyrosine 39 in methamphetamine-induced neurotoxicity in vitro and in vivo
Source: PubMed Central journal article supplement — Neural Regen Res. 2019 Feb;14(2):319–27. doi: 10.4103/1673-5374.244795 (PMC6301162; doi:10.4103/1673-5374.244795), 2019-02
Supplement: NRR-14-319_Suppl1.pdf [file NRR-14-319_Suppl1.pdf]

## OPEN PEER REVIEW REPORT 1

**Reviewer:** Jin-Tao Li, Kunming Medical University, China.

**Comments to the authors:**

This paper is a new and significant study for PD pathogenesis, in which some sensitive molecules that are closely related to PD pathologies are investigated. It has been found that inhibition of nT39  $\alpha$ -Syn formation may be a promising strategy to treat METH-induced dopaminergic neurotoxicity, which has the prominent significance for PD's pathogenesis and treatment, both in theoretically and practically. However, the positive data in "Result" part must be presented better and clearer so that the authors can grasp the key outcome when they look up them immediately.
