# Supplementary material for: Implications of alpha-synuclein nitration at tyrosine 39 in methamphetamine-induced neurotoxicity in vitro and in vivo
Source: PubMed Central journal article supplement — Neural Regen Res. 2019 Feb;14(2):319–27. doi: 10.4103/1673-5374.244795 (PMC6301162; doi:10.4103/1673-5374.244795), 2019-02
Supplement: NRR-14-319_Suppl2.pdf [file NRR-14-319_Suppl2.pdf]

## OPEN PEER REVIEW REPORT 2

**Reviewer:** Lorenzo Di Cesare Mannelli, University of Florence, Italy.

**Comments to the authors:**

The topic is interesting and new, the authors present an impressive quantity of data, the weakness is in the poor language and in the use of undifferentiated shsy cells

The research is interesting and well conducted. A main point should be discuss, the author perform the experiments in shsy5y cells that are described as cholinergic neurons. The differentiation with retinoic acid induces a dopaminergic phenotype (S.P. Presgraves et al., Neurotox. Res., 5 (2004), pp. 579-598; Branca et al., Toxicol In Vitro. 2018 Apr;48:159-169) that probably could be preferable for Parkinson-related studies. Authors should be discuss these papers and comment this point.
